# Supplementary material for: Protective Effects of Omega-3 Supplementation against Doxorubicin-Induced Deleterious Effects on the Liver and Kidneys of Rats
Source: MDPI journal article supplement (doi:10.3390/molecules28073004), 2023-03-28
Supplement: s1 [file s1]

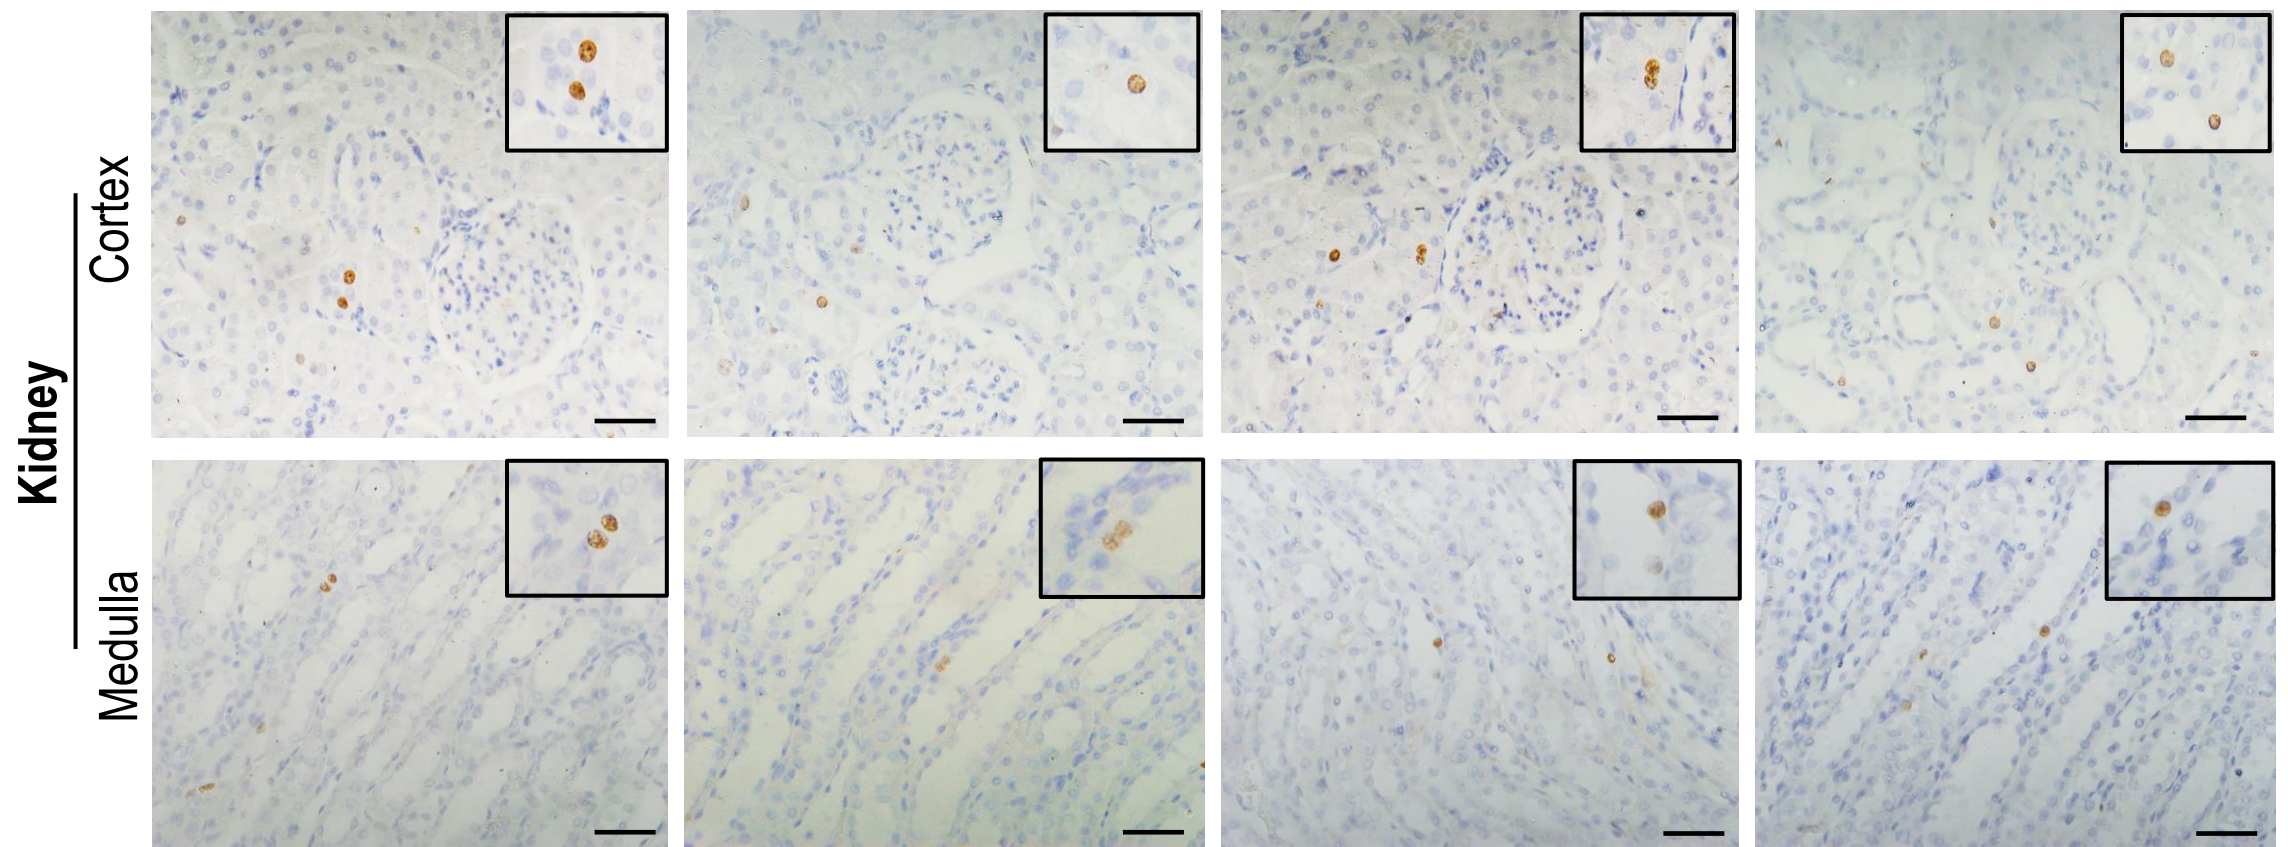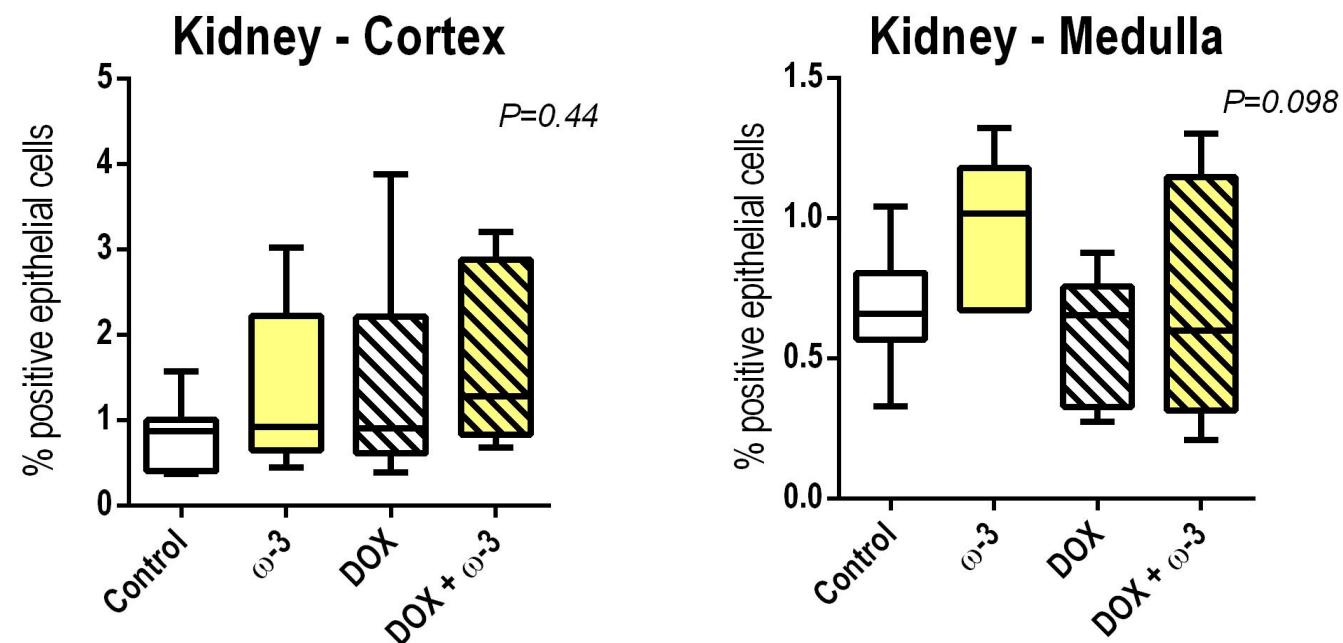

**Supplementary Data S3.** Effects of omega 3 ( $\omega$ -3) supplementation on doxorubicin (DOX)-induced effects epithelial cell proliferation (Ki-67-immunostained sections) in kidney cortex and medulla. Representative photomicrographs are presented [scale bar: 20  $\mu$ m]. Data are presented as box plots. N = 7 rats/group. Wistar rats received  $\omega$ -3 (400 mg/kg body weight/day) by intragastrical administrations for six weeks (or vehicle). After two weeks of  $\omega$ -3 supplementation, animals received weekly single intraperitoneal injections of DOX (3.5 mg/kg body weight) for four weeks (or vehicle). Data were analyzed by Kruskal-Wallis followed by *a posteriori* Tukey test ( $P<0.05$ ).
