# Supplementary material for: Protective Effects of Omega-3 Supplementation against Doxorubicin-Induced Deleterious Effects on the Liver and Kidneys of Rats
Source: MDPI journal article supplement (doi:10.3390/molecules28073004), 2023-03-28
Supplement: s1 [file s1]

**A****Control**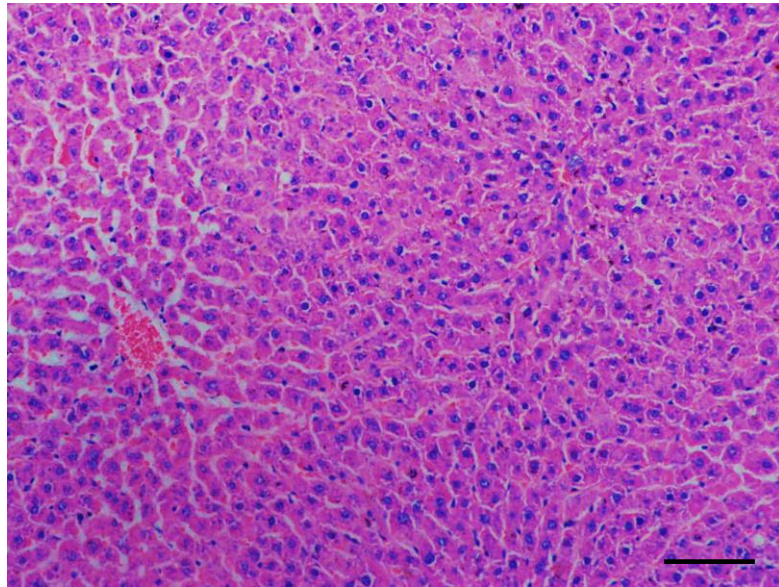 **$\omega$ -3**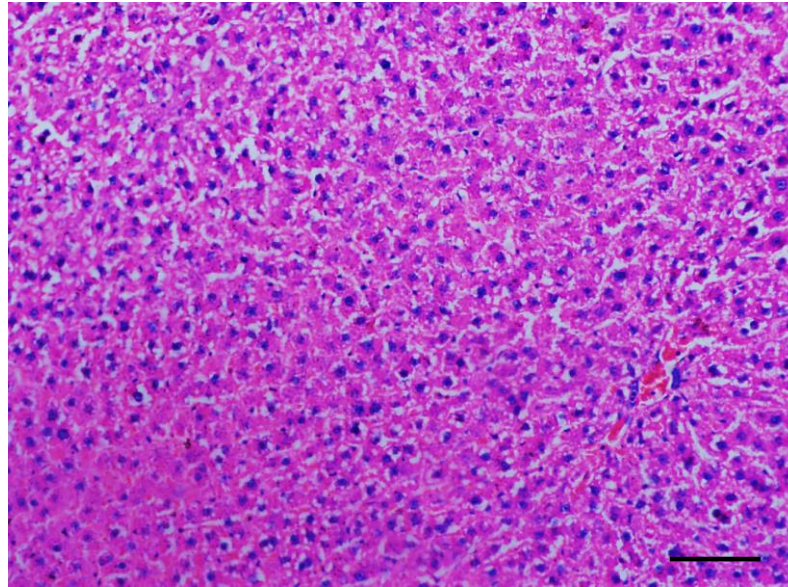**DOX**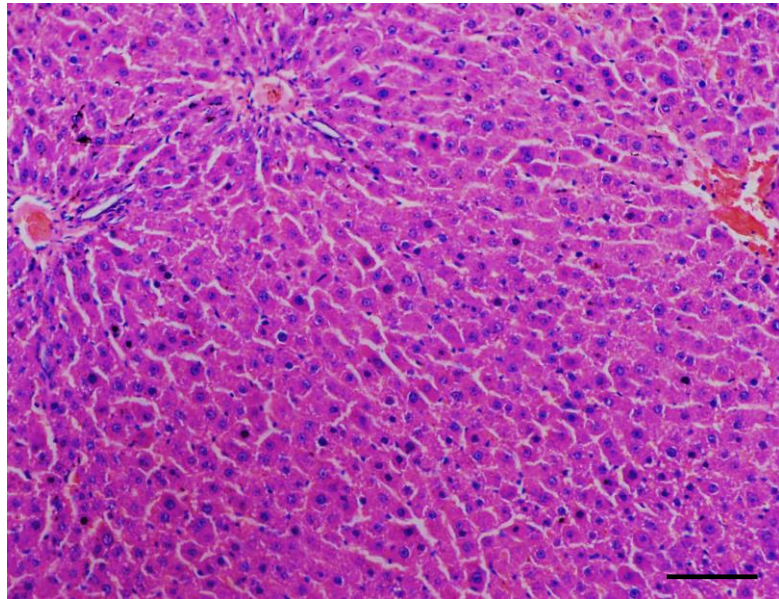**DOX +  $\omega$ -3**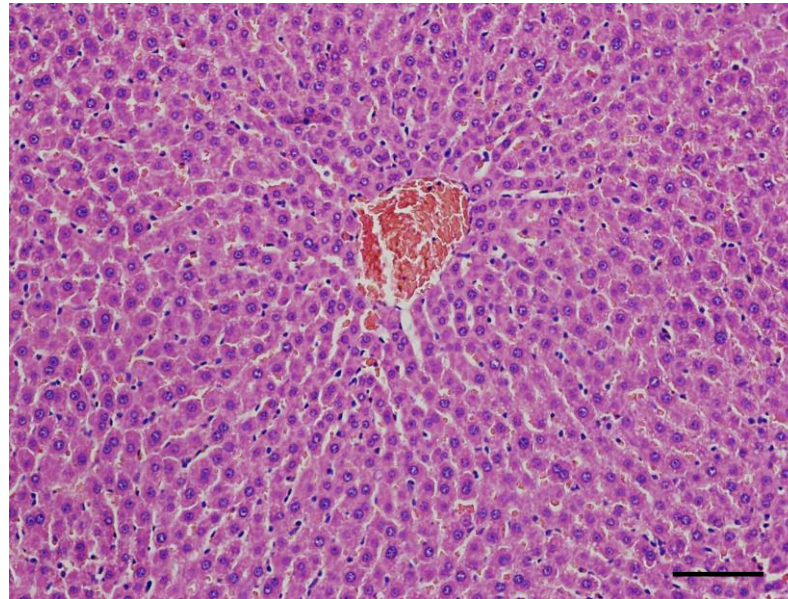**B****Control**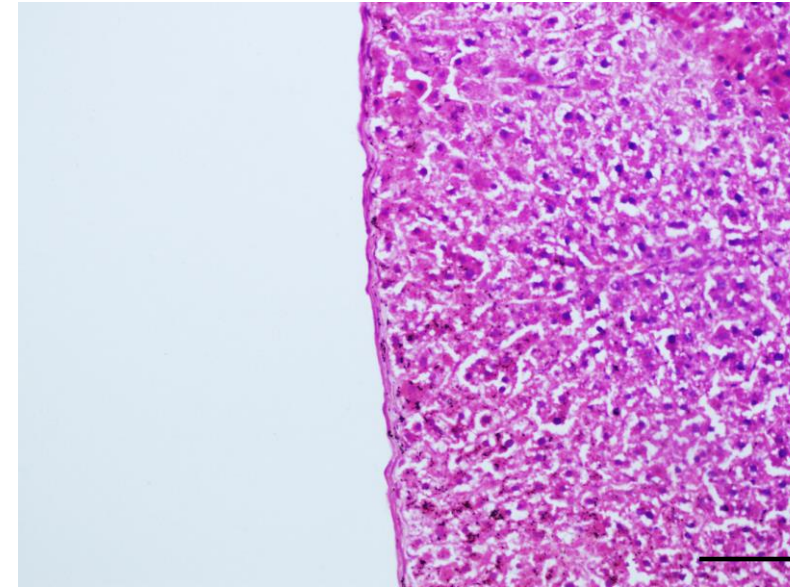 **$\omega$ -3**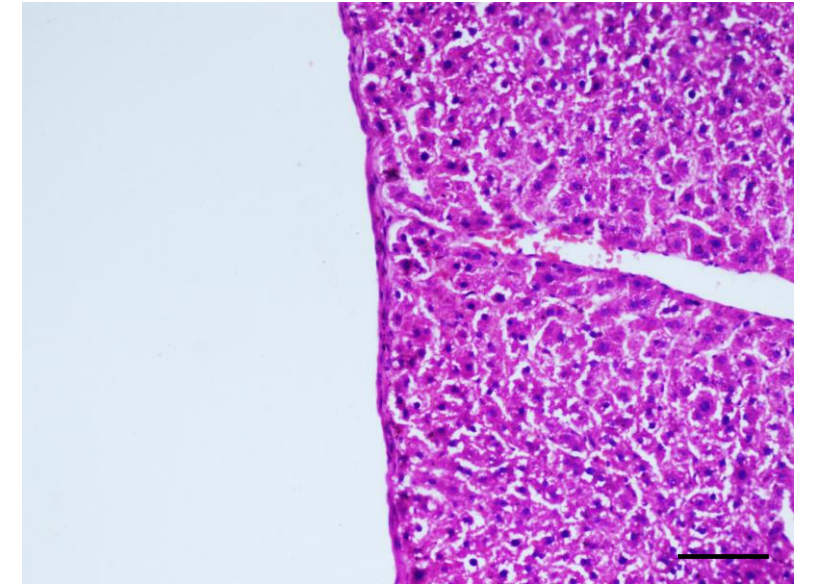**DOX**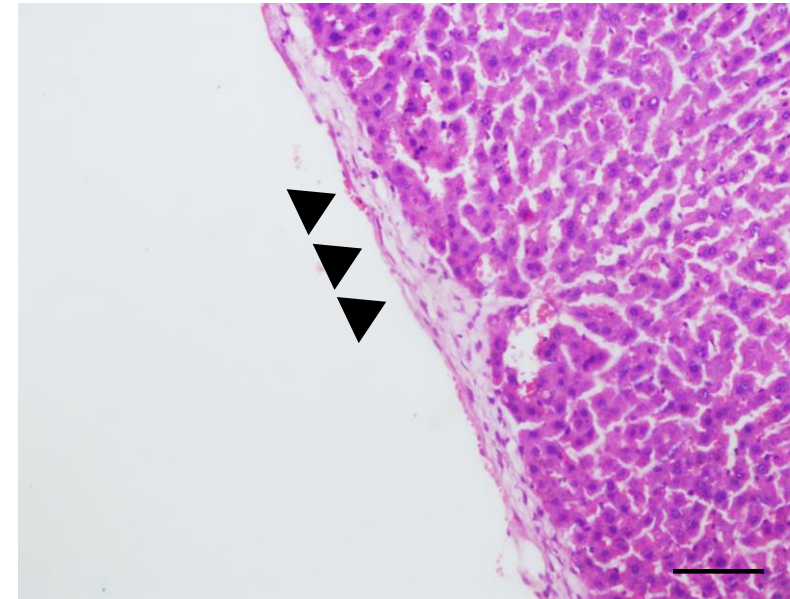**DOX +  $\omega$ -3**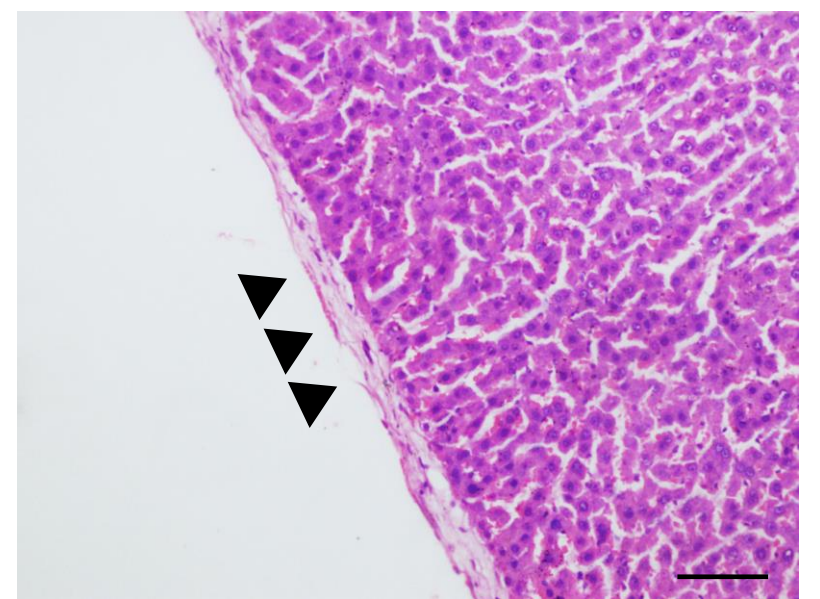

**Supplementary Data S1.** Representative photomicrographs of HE-stained sections (scale bar: 50  $\mu$ m) of the **(A)** hepatic parenchyma and **(B)** Glisson's capsule (arrowheads). Wistar rats received omega ( $\omega$ -3, 400 mg/kg body weight/day) by intragastrical administrations for six weeks (or vehicle). After two weeks of  $\omega$ -3 supplementation, animals received weekly single intraperitoneal injections of doxorubicin (DOX, 3.5 mg/kg body weight) for four weeks (or vehicle).
